# Supplementary material for: Estimation of the Population Size of Men Who Have Sex With Men in Vietnam: Social App Multiplier Method
Source: PubMed Central journal article supplement (PMC6492067; doi:10.2196/12451), 2019-04-17
Supplement: publichealth_v5i2e12451_app1.pdf [file publichealth_v5i2e12451_app1.pdf]

Method of Extrapolation from the study provinces and calculation of the national population size of MSM:

Step 1: Calculate population of MSM 15 to 49 years old in the reference province that produced reliable estimates, weighted by the proportion of Jack'd users in each age group:

$$P_{ry[15-49]} = p_{ry[18-49]} * (n_{ry[15-19]} * q_{18-19} + n_{ry[20-24]} * q_{20-24} + n_{ry[25-29]} * q_{25-29} + n_{ry[30-34]} * q_{30-34} + n_{ry[35-39]} * q_{35-39} + n_{ry[40-44]} * q_{40-44} + n_{ry[45-49]} * q_{45-49}) * 7 / n_{ry[18-49]}$$

Where  $p_{ry[18-49]}$  is the estimated size of MSM population (18-49) in the reference province y obtained by the multiplier method in this study,  $q_{i-j}$  is the percentage of national Jack'd users in each age group i-j, and  $n_{r i-j}$  is the total male population in each age group i-j of the reference province y.

Note: The Viet Nam general population data is available in 5-year increments, including the 15-19 age group. Due to the limitation of working with males 18 and older in this study, to calculate the needed 18-19 age group in the population an assumption was made that  $n_{ry[18-19]} = n_{ry[15-19]} * 2/5$

Step 2: Extrapolate the MSM population (15-49) from the reference province to another province x in the reference region:

$$p'_{x[15-49]} = P_{ry[15-49]} * (n_{x[15-19]} * q_{18-19} + n_{x[20-24]} * q_{20-24} + n_{x[25-29]} * q_{25-29} + n_{x[30-34]} * q_{30-34} + n_{x[35-39]} * q_{35-39} + n_{x[40-44]} * q_{40-44} + n_{x[45-49]} * q_{45-49}) * 7 / n_{ry[15-49]}$$

Where  $n_{x[i-j]}$  is the total male population in each age group i-j of the extrapolated province x. Step 2 is repeated for each province linked to a reference province listed under the "Extrapolated from Province" in the Table below.

Step 3: Calculate national population size of MSM 15-49:

$$p_{MSM15-49} = p'_{1[15-49]} + p'_{2[15-49]} + \dots + p'_{50[15-49]} + p_{r1[15-49]} + p_{r2[15-49]} + \dots + p_{r11[15-49]} + p_{hcmc} + p_{na}$$

Where  $p'_{x[15-49]}$  are the MSM population (15-49) in the 50 provinces where estimates were extrapolated to,  $p_{ry[15-49]}$  are the MSM population (15-49) in the 11 reference provinces where reliable estimates were directly obtained in this study, and  $p_{hcmc}$  and  $p_{na}$  are the MSM population (15-49) in Ho Chi Minh City and Nghe An province respectively which were previously estimated during a piloting of this method in 2016.

| <b>Region</b>       | <b>Province</b> | <b>Extrapolated from province</b> |
|---------------------|-----------------|-----------------------------------|
| Central Highlands   | Dak Lak         |                                   |
| Central Highlands   | Dak Nong        | Dak Lak                           |
| Central Highlands   | Gia Lai         | Dak Lak                           |
| Central Highlands   | Kon Tum         | Dak Lak                           |
| Central Highlands   | Lam Dong        | Dak Lak                           |
| Mekong Delta        | An Giang        | Dong Thap                         |
| Mekong Delta        | Bac Lieu        | Dong Thap                         |
| Mekong Delta        | Ben Tre         | Dong Thap                         |
| Mekong Delta        | Ca Mau          | Dong Thap                         |
| Mekong Delta        | Can Tho         |                                   |
| Mekong Delta        | Dong Thap       |                                   |
| Mekong Delta        | Hau Giang       | Dong Thap                         |
| Mekong Delta        | Kien Giang      | Dong Thap                         |
| Mekong Delta        | Long An         | Dong Thap                         |
| Mekong Delta        | Soc Trang       | Dong Thap                         |
| Mekong Delta        | Tien Giang      | Dong Thap                         |
| Mekong Delta        | Tra Vinh        | Dong Thap                         |
| Mekong Delta        | Vinh Long       | Dong Thap                         |
| North Central Coast | Ha Tinh         | Thanh Hoa                         |
| North Central Coast | Nghe An         |                                   |
| North Central Coast | Quang Binh      | Thanh Hoa                         |
| North Central Coast | Quang Tri       | Thanh Hoa                         |
| North Central Coast | Thanh Hoa       |                                   |
| North Central Coast | Thua Thien Hue  | Thanh Hoa                         |
| Northeast           | Bac Giang       |                                   |
| Northeast           | Bac Kan         | Bac Giang                         |
| Northeast           | Cao Bang        | Bac Giang                         |
| Northeast           | Ha Giang        | Bac Giang                         |
| Northeast           | Lang Son        | Bac Giang                         |
| Northeast           | Phu Tho         | Bac Giang                         |
| Northeast           | Quang Ninh      | Bac Giang                         |
| Northeast           | Thai Nguyen     | Bac Giang                         |
| Northeast           | Tuyen Quang     | Bac Giang                         |
| Northwest           | Dien Bien       | Bac Giang                         |
| Northwest           | Hoa Binh        | Bac Giang                         |
| Northwest           | Lai Chau        | Bac Giang                         |
| Northwest           | Lao Cai         | Bac Giang                         |
| Northwest           | Son La          | Bac Giang                         |
| Northwest           | Yen Bai         | Bac Giang                         |
| Red River Delta     | Bac Ninh        | Nam Dinh                          |
| Red River Delta     | Ha Nam          | Nam Dinh                          |
| Red River Delta     | Ha Noi          |                                   |
| Red River Delta     | Hai Duong       | Nam Dinh                          |
| Red River Delta     | Hai Phong       |                                   |
| Red River Delta     | Hung Yen        | Nam Dinh                          |
| Red River Delta     | Nam Dinh        |                                   |
| Red River Delta     | Ninh Binh       | Nam Dinh                          |
| Red River Delta     | Thai Binh       | Nam Dinh                          |

|                     |                  |           |
|---------------------|------------------|-----------|
| Red River Delta     | Vinh Phuc        | Nam Dinh  |
| South Central Coast | Binh Dinh        |           |
| South Central Coast | Binh Thuan       | Binh Dinh |
| South Central Coast | Da Nang          |           |
| South Central Coast | Khanh Hoa        | Binh Dinh |
| South Central Coast | Ninh Thuan       | Binh Dinh |
| South Central Coast | Phu Yen          | Binh Dinh |
| South Central Coast | Quang Nam        | Binh Dinh |
| South Central Coast | Quang Ngai       | Binh Dinh |
| Southeast           | B.Ria-V.Tau      | Dong Nai  |
| Southeast           | Binh Duong       | Dong Nai  |
| Southeast           | Binh Phuoc       | Dong Nai  |
| Southeast           | Dong Nai         |           |
| Southeast           | Ho Chi Minh City |           |
| Southeast           | Tay Ninh         | Dong Nai  |
