# Supplementary material for: Estimation of the Population Size of Men Who Have Sex With Men in Vietnam: Social App Multiplier Method
Source: PubMed Central journal article supplement (PMC6492067; doi:10.2196/12451), 2019-04-17
Supplement: publichealth_v5i2e12451_app2.pdf [file publichealth_v5i2e12451_app2.pdf]

| Province  | Convergence (on Jack'd use in last 30 days) | Convergence (on all time Jack'd usage)    | Bottlenecking (on Jack'd use in last 30 days)              | Bottlenecking (on all time Jack'd usage) |
|-----------|---------------------------------------------|-------------------------------------------|------------------------------------------------------------|------------------------------------------|
| An Giang  | <p>Convergence plot of jackd_30day=YES</p>  | <p>Convergence plot of jackd_user=YES</p> | <p>jackd_30day=YES</p>                                     | <p>jackd_user=YES</p>                    |
| Bac Giang | <p>Convergence plot of jackd_30day=YES</p>  | <p>Convergence plot of jackd_user=YES</p> | <p>jackd_30day=YES</p>                                     | <p>jackd_user=YES</p>                    |
| Binh Dinh | <p>Convergence plot of jackd_30day</p>      | <p>Convergence plot of jackd_user=YES</p> | <p>jackd_30day=FORGOT, jackd_30day=NO, jackd_30day=YES</p> | <p>jackd_user=YES</p>                    |

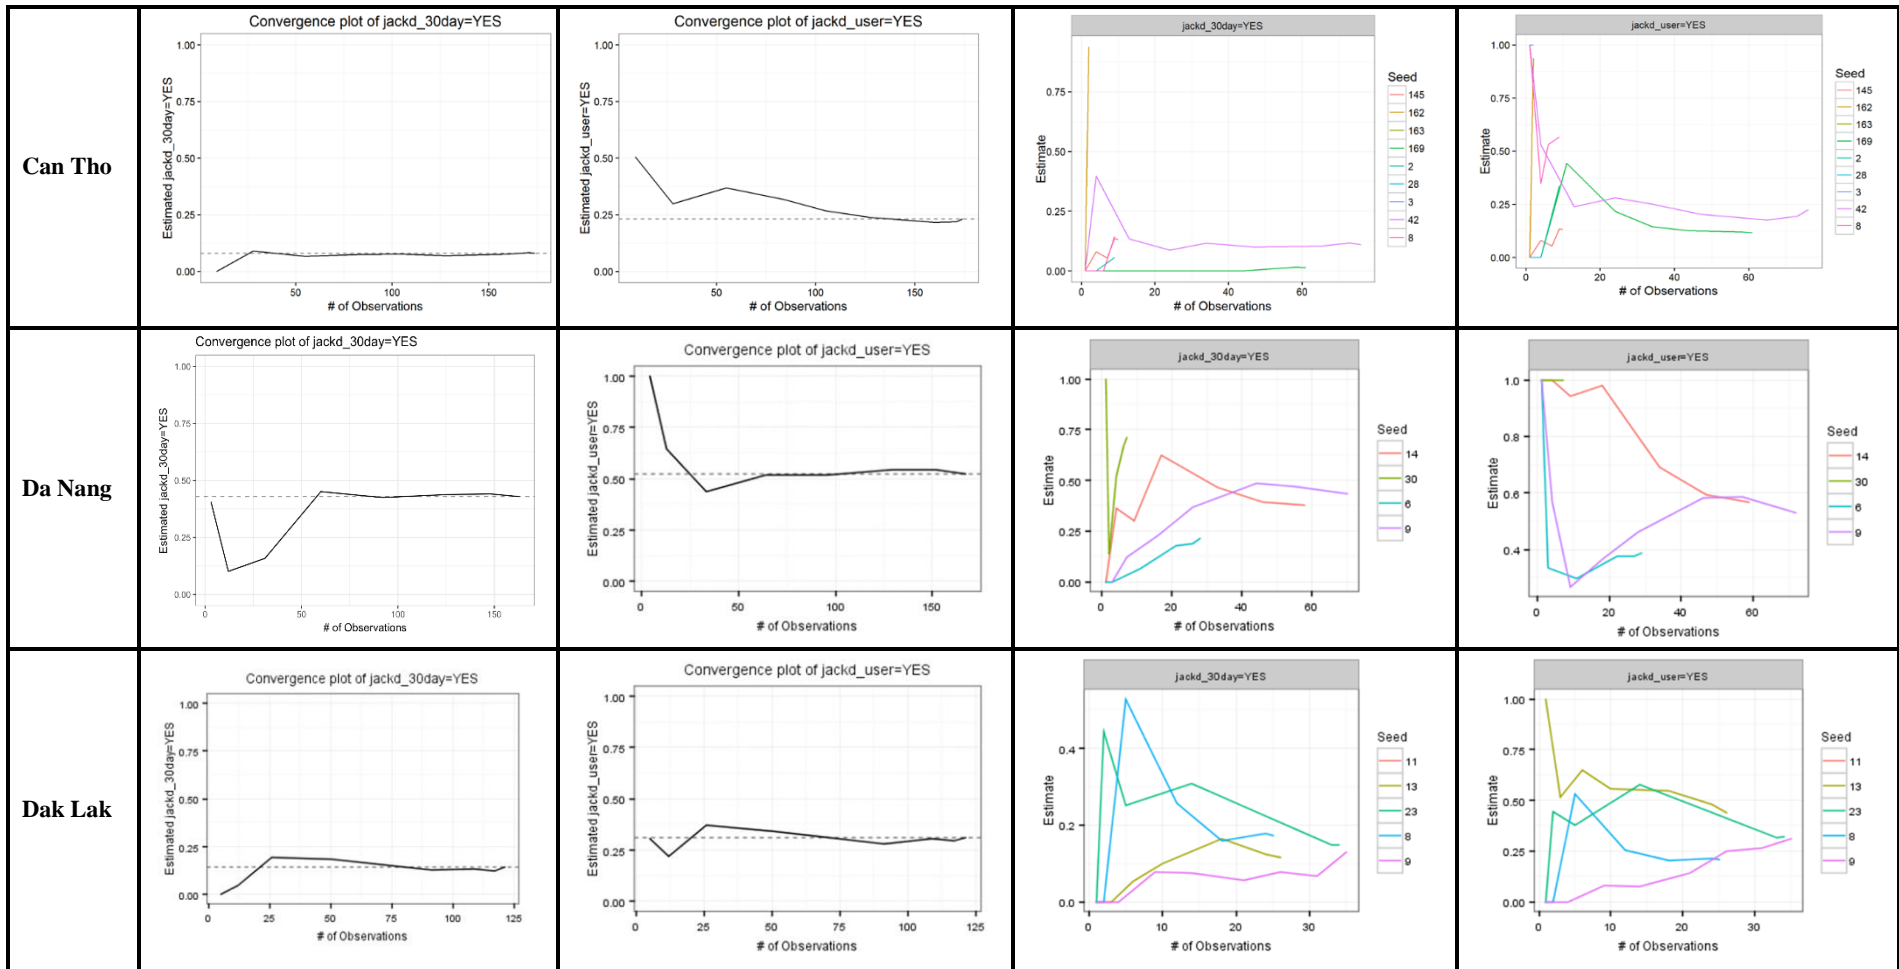

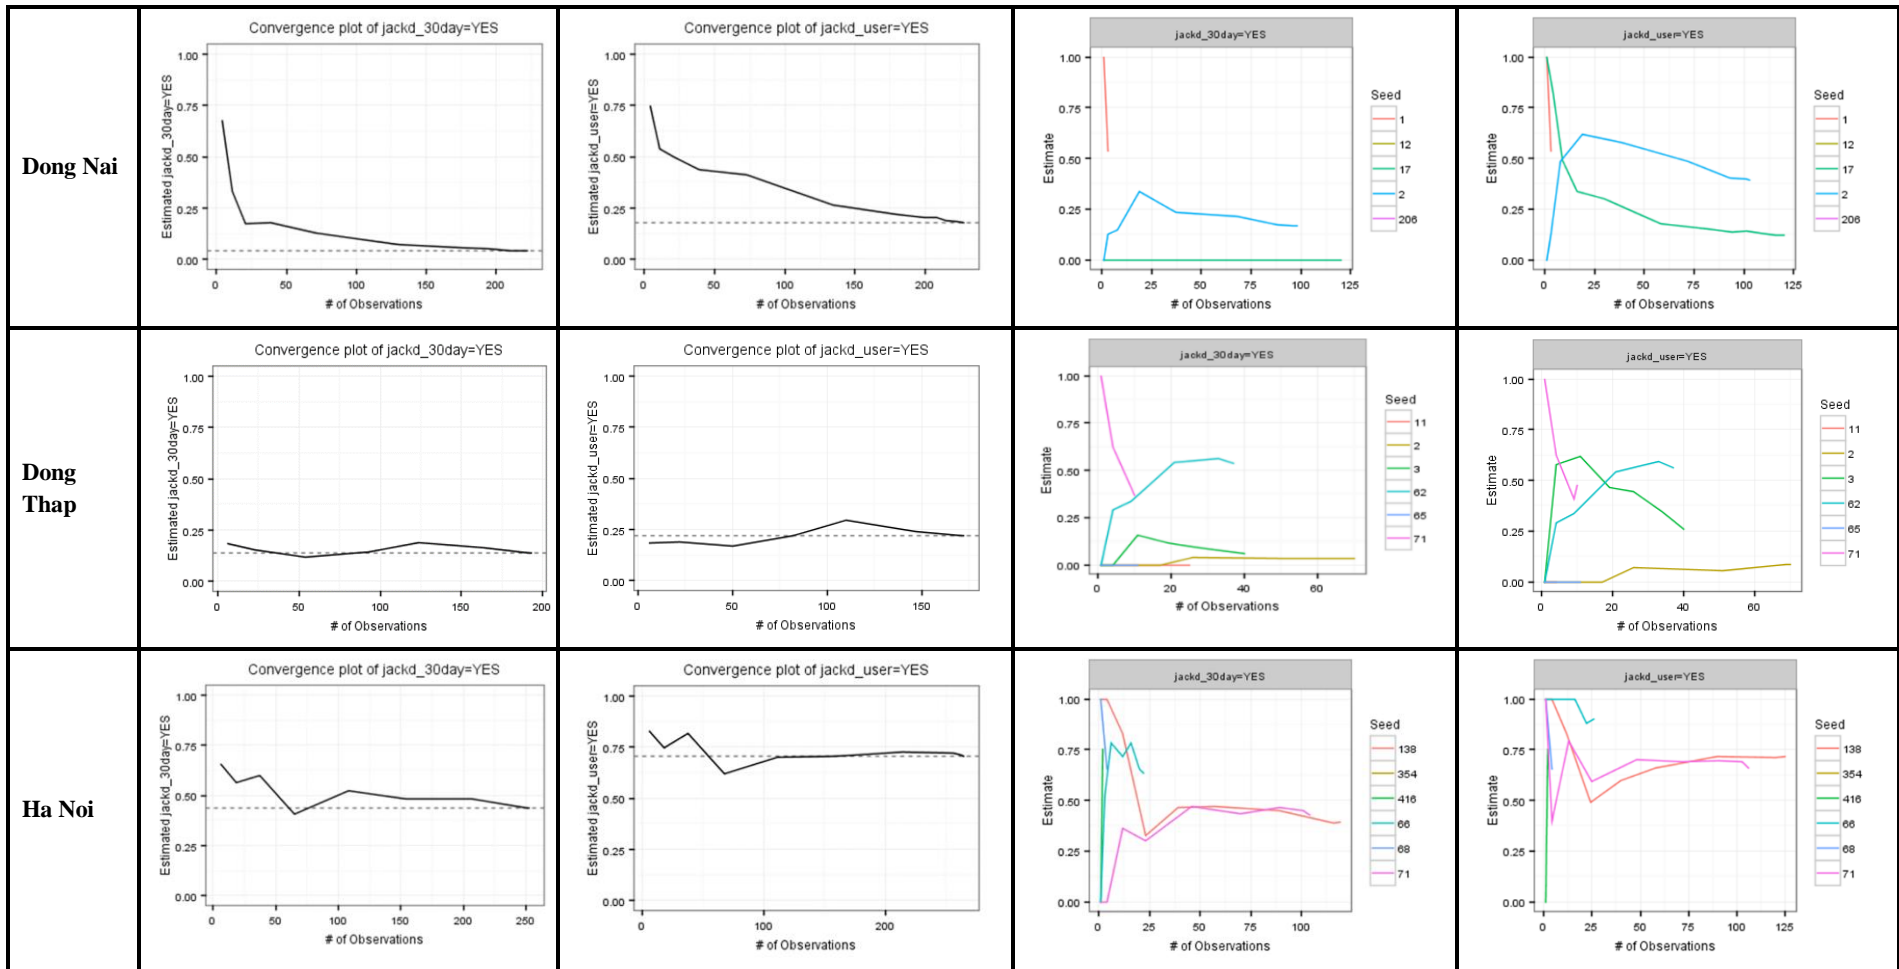

**Hai Phong**

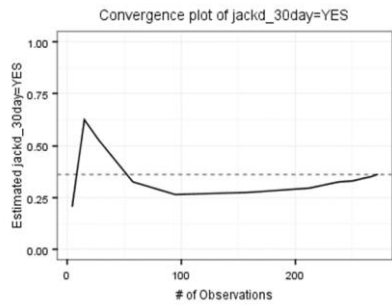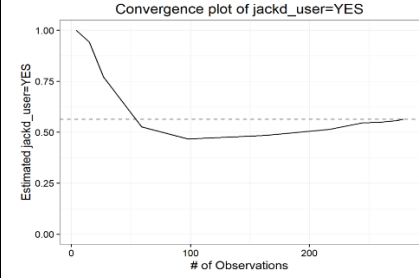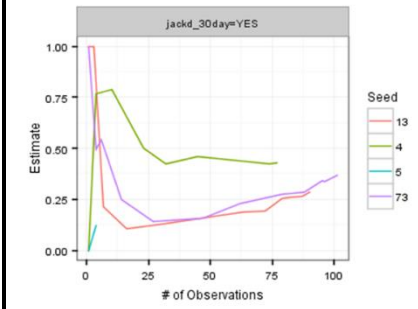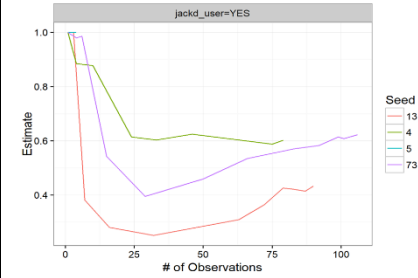

**Nam Dinh**

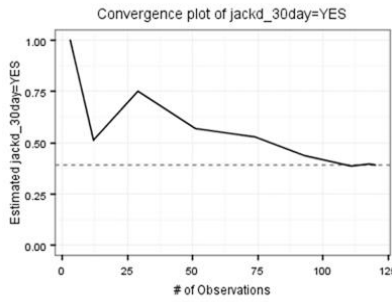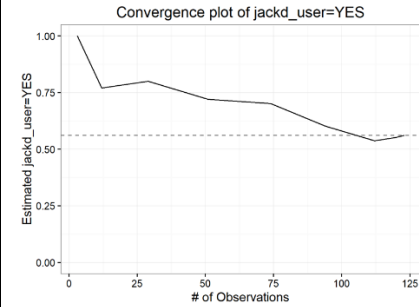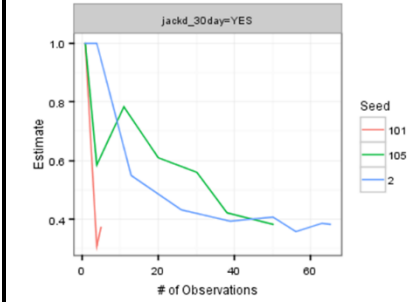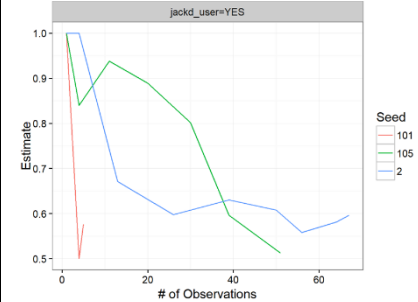

**Thanh Hoa**

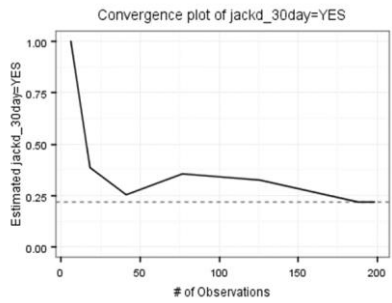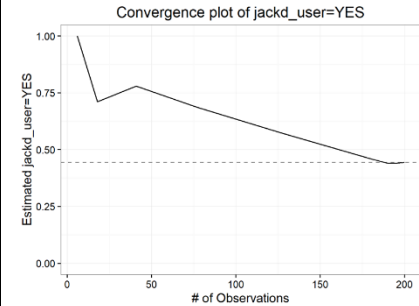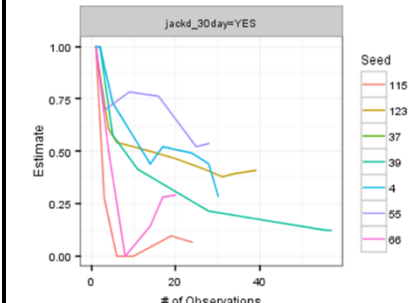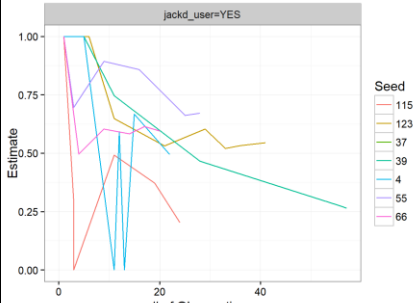

| <b>Province</b>  | <b>Sensitivity<br/>(on Jack'd<br/>use in last<br/>30 days)<br/>(%)</b> | <b>Sensitivity<br/>(on all time<br/>Jack'd<br/>usage)<br/>(%)</b> | <b>Homophily<br/>(on Jack'd<br/>use in last<br/>30 days)</b> | <b>Homophily<br/>(on all time<br/>Jack'd<br/>usage)</b> |
|------------------|------------------------------------------------------------------------|-------------------------------------------------------------------|--------------------------------------------------------------|---------------------------------------------------------|
| <b>An Giang</b>  | 10.7                                                                   | 19.5                                                              | 1.51                                                         | 1.25                                                    |
| <b>Bac Giang</b> | 41.7                                                                   | 60.6                                                              | 0.61                                                         | 1.04                                                    |
| <b>Binh Dinh</b> | 32.1                                                                   | 75.4                                                              | 1.35                                                         | 1.76                                                    |
| <b>Can Tho</b>   | 11.3                                                                   | 24.7                                                              | 0.94                                                         | 2.15                                                    |
| <b>Da Nang</b>   | 41.6                                                                   | 59.9                                                              | 1.79                                                         | 1.52                                                    |
| <b>Dak Lak</b>   | 17.1                                                                   | 33.3                                                              | 0.99                                                         | 1.12                                                    |
| <b>Dong Nai</b>  | 29.9                                                                   | 7.1                                                               | 0.99                                                         | 1.77                                                    |
| <b>Dong Thap</b> | 15.6                                                                   | 22.2                                                              | 1.53                                                         | 1.59                                                    |
| <b>Ha Noi</b>    | 59.5                                                                   | 78.1                                                              | 1.46                                                         | 1.91                                                    |
| <b>Hai Phong</b> | 27.8                                                                   | 44.9                                                              | 1.25                                                         | 1.13                                                    |
| <b>Nam Dinh</b>  | 49.2                                                                   | 63.6                                                              | 1.00                                                         | 0.92                                                    |
| <b>Thanh Hoa</b> | 33.8                                                                   | 43.7                                                              | 1.36                                                         | 1.26                                                    |
